# Supplementary material for: Sequence variant at 8q24.21 associates with sciatica caused by lumbar disc herniation
Source: PubMed Central journal article supplement (PMC5322534; doi:10.1038/ncomms14265), 2017-02-22
Supplement: ncomms14265-s1.pdf [file ncomms14265-s1.pdf]

### Sequence variant at 8q24.21 associates with sciatica caused by lumbar disc herniation

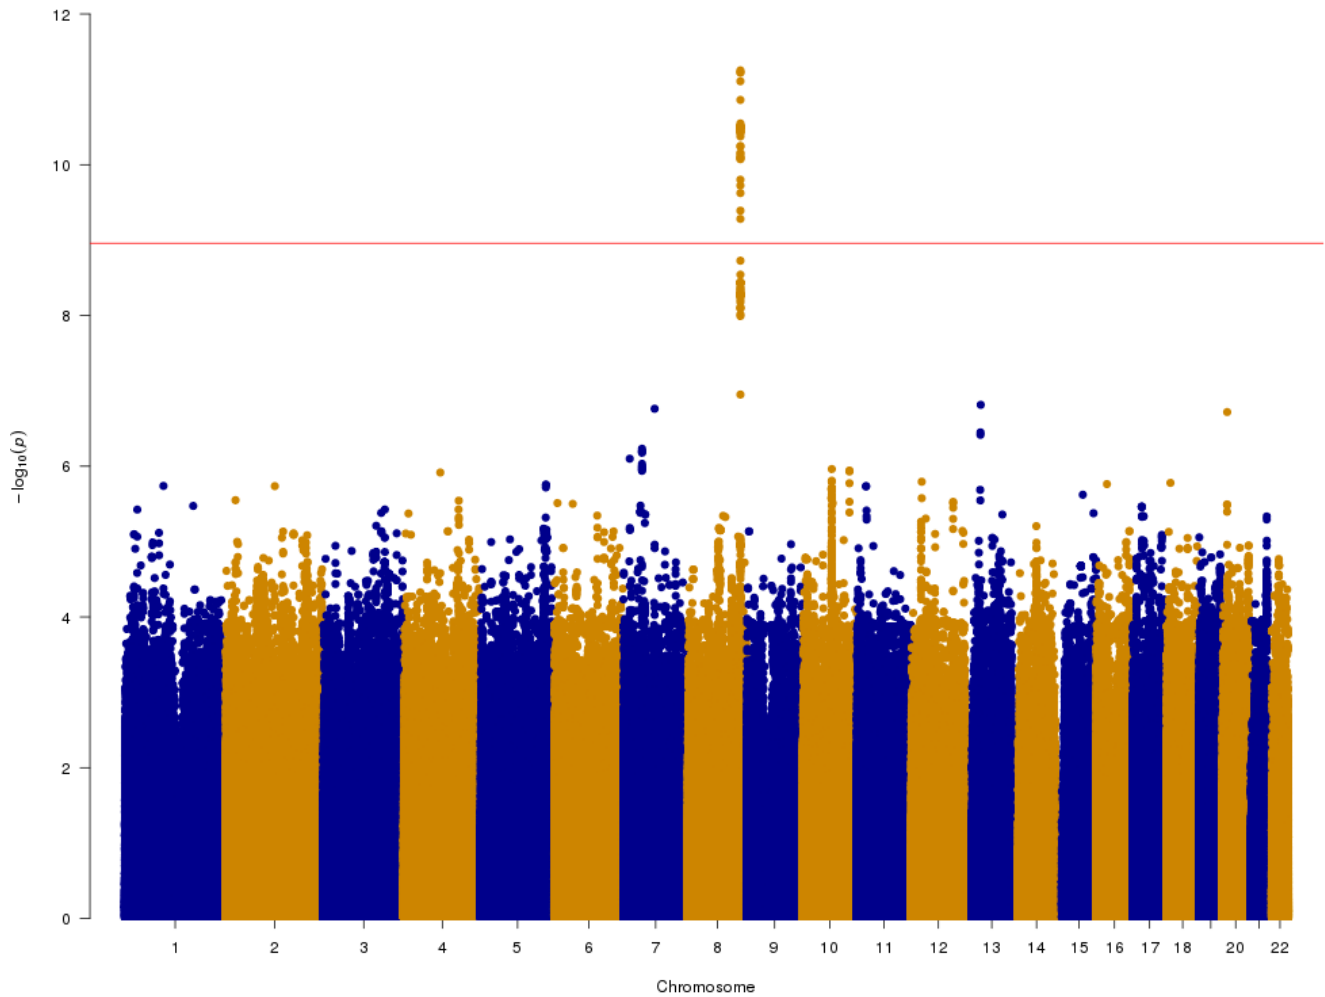

**Supplementary Figure 1. Manhattan plot of GWAS findings in the Icelandic discovery sample.** A novel locus on 8q24.21 between *GSDMC* and *CCDC26* associated with microdiscectomy for symptomatic herniated lumbar discs (LDHsurg). Additive model. For the plot, the  $-\log_{10} P$  - values (y axis) of sequence variants are shown according to their chromosomal position (x axis). The red line indicates the weighted threshold<sup>1</sup> for genome-wide statistical significance ( $P = 1.1 \times 10^{-9}$ ). A Chi-squared test was used to calculate  $P$  - values for all GWAS associations.

| marker                  | Position (hg38) | Effect allele | Effect allele frequency | European allele frequency | Effect (OR) | P-value  |
|-------------------------|-----------------|---------------|-------------------------|---------------------------|-------------|----------|
| rs6651255               | chr8:129711546  | C             | 23.3                    | 21.4                      | 0.813       | 5.61E-12 |
| rs7833174               | chr8:129706526  | C             | 23.3                    | 21.5                      | 0.814       | 5.97E-12 |
| rs4130415               | chr8:129706466  | C             | 23.3                    | 21.5                      | 0.814       | 5.99E-12 |
| rs7816342               | chr8:129707377  | A             | 23.4                    | 21.4                      | 0.815       | 7.81E-12 |
| rs10956487              | chr8:129705470  | G             | 23.2                    | 21.5                      | 0.816       | 1.38E-11 |
| rs35383270              | chr8:129709547  | A             | 21.4                    | 18.6                      | 0.813       | 2.83E-11 |
| rs6986256               | chr8:129716115  | A             | 21.7                    | 6.4                       | 0.815       | 3.07E-11 |
| rs6470765               | chr8:129724451  | C             | 21.7                    | 18.5                      | 0.815       | 3.09E-11 |
| rs2062078               | chr8:129722215  | T             | 21.7                    | 18.5                      | 0.815       | 3.09E-11 |
| rs4733726               | chr8:129719156  | T             | 21.7                    | 18.5                      | 0.815       | 3.13E-11 |
| rs60228607              | chr8:129723214  | T             | 21.7                    | 18.5                      | 0.815       | 3.13E-11 |
| rs7841981               | chr8:129723084  | A             | 21.7                    | 18.7                      | 0.815       | 3.13E-11 |
| rs3886937               | chr8:129725145  | C             | 21.7                    | 18.5                      | 0.815       | 3.13E-11 |
| rs6985118               | chr8:129724683  | T             | 21.7                    | 18.5                      | 0.815       | 3.14E-11 |
| rs3886938               | chr8:129725300  | G             | 21.7                    | 18.5                      | 0.815       | 3.14E-11 |
| rs373138845, rs66937183 | chr8:129721601  | G             | 21.7                    | 18.5                      | 0.815       | 3.21E-11 |
| rs1074286               | chr8:129725355  | T             | 21.7                    | 18.5                      | 0.815       | 3.23E-11 |
| rs4733724               | chr8:129711482  | G             | 21.7                    | 18.7                      | 0.815       | 3.24E-11 |
| rs7815298               | chr8:129720493  | C             | 21.7                    | 13.3                      | 0.815       | 3.24E-11 |
| rs7826493               | chr8:129726726  | G             | 21.7                    | 18.6                      | 0.815       | 3.48E-11 |
| rs4733732               | chr8:129726211  | T             | 21.7                    | 13.8                      | 0.815       | 3.50E-11 |
| rs10956490              | chr8:129718998  | C             | 21.7                    | 18.5                      | 0.815       | 3.57E-11 |
| rs7815955               | chr8:129707321  | T             | 21.7                    | 18.6                      | 0.815       | 3.64E-11 |
| rs116662391             | chr8:129709175  | C             | 21.4                    | 22.56                     | 0.814       | 3.73E-11 |
| rs6470764               | chr8:129713419  | T             | 21.7                    | 18.5                      | 0.816       | 3.79E-11 |
| rs28743107              | chr8:129723416  | T             | 21.7                    | 23.26                     | 0.816       | 4.21E-11 |
| rs10585686              | chr8:129707190  | G             | 21.9                    | 24.35                     | 0.818       | 5.66E-11 |
| rs79164994              | chr8:129707197  | G             | 21.6                    | 24.35                     | 0.817       | 5.72E-11 |
| rs11984666              | chr8:129718034  | A             | 21.6                    | 18.5                      | 0.818       | 6.95E-11 |
| rs4733725               | chr8:129719130  | T             | 21.6                    | 18.5                      | 0.818       | 7.18E-11 |
| rs10808583              | chr8:129705774  | A             | 21.6                    | 18.7                      | 0.818       | 7.91E-11 |
| rs7814941               | chr8:129706613  | G             | 21.6                    | 18.7                      | 0.818       | 7.95E-11 |
| rs7816131               | chr8:129707472  | T             | 21.6                    | 18.6                      | 0.818       | 8.30E-11 |
| rs35264025,rs59706047   | chr8:129709503  | T             | 21.6                    | 18.6                      | 0.818       | 8.44E-11 |
| rs4368942               | chr8:129717272  | GA            | 20.8                    | 21.87                     | 0.818       | 1.89E-10 |
| rs557156781,rs777595489 | chr8:129723419  | CT            | 19.6                    | 0                         | 0.812       | 2.38E-10 |
| rs6470763               | chr8:129708400  | C             | 19.9                    | 18.3                      | 0.819       | 4.07E-10 |

**Supplementary Table 1.** LDHsurg associated markers reaching weighted genome-wide significance

threshold<sup>1</sup>.

| Associations listed in GWAS catalogue with SNPs in <i>GSDMC</i> or <i>CCDC26</i> |            |                     |                              |                                |               |                        |                   |      |        |         | Association of GWAS catalogue SNP with corresponding phenotype in Icelandic data* |               |                        |      |          | Top marker (BestSNP) in region (within +/- 500 Kb of rs6651255) associating with corresponding phenotype in Icelandic data |                             |               |                        |                                    | Association of rs6651255[C] (chr8:129711546) with corresponding phenotype in Icelandic data |    |          |           |        |          |          |
|----------------------------------------------------------------------------------|------------|---------------------|------------------------------|--------------------------------|---------------|------------------------|-------------------|------|--------|---------|-----------------------------------------------------------------------------------|---------------|------------------------|------|----------|----------------------------------------------------------------------------------------------------------------------------|-----------------------------|---------------|------------------------|------------------------------------|---------------------------------------------------------------------------------------------|----|----------|-----------|--------|----------|----------|
| Phenotype                                                                        | SNP        | Position (build 38) | Close genes                  | Study (PMID), Yr               | Effect Allele | Effect Allele Freq (%) | r2 with rs6651255 | OR   | Beta   | P-value | <i>N</i> <sub>case/</sub> <i>N</i> <sub>ctrl</sub> <sup>(a)</sup>                 | Effect Allele | Effect Allele Freq (%) | OR   | Beta     | P-value                                                                                                                    | BestSNP (Pos)               | Effect Allele | Effect Allele Freq (%) | r2 with GWAS catalogue SNP         | r2 of BESTSNP with rs6651255                                                                | OR | Beta     | P-value   | OR     | Beta     | P-value  |
| Height                                                                           | rs4733724  | chr8:129711482      | <i>GSDMC</i> , <i>CCDC26</i> | Wood AR (25282103), 2014       | A             | 80.2                   | 0.91              |      | 0.050  | 1 E-41  | 72,613                                                                            | A             | 78.3                   |      | 0.034    | 1.34E-05                                                                                                                   | rs7816131 (chr8:129707472)  | T             | 18.6                   | 0.99 (rs4733724), 0.99 (rs6470764) | 0.90                                                                                        |    | -0.036   | 3.37E-06  | -0.032 | 2.60E-05 |          |
|                                                                                  | rs6470764  | chr8:129713419      | <i>GSDMC</i> , <i>CCDC26</i> | Lango Allen H (20881960), 2010 | T             | 20                     | 0.91              |      | -0.050 | 2 E-28  | 72,613                                                                            | T             | 21.7                   |      | -0.03    | 1.35E-05                                                                                                                   |                             |               |                        |                                    |                                                                                             |    |          |           |        |          |          |
| Glioma                                                                           | rs4295627  | chr8:129673211      | <i>GSDMC</i> , <i>CCDC26</i> | Sanson M (21531791), 2011      | G             | NR                     | 0.01              | 1.40 |        | 5 E-21  | 702/358,789                                                                       | G             | 17.8                   | 1.10 | 0.225    | rs55862293 <sup>(c)</sup> (chr8:129579134)                                                                                 | G                           | 8.3           | 0.22 (rs4295627)       | 0.01                               | 1.71                                                                                        |    | 5.38E-08 | 1.15      | 0.069  |          |          |
|                                                                                  | rs4295627  | chr8:129673211      | <i>GSDMC</i> , <i>CCDC26</i> | Shete S (19578367), 2009       | G             | 17 <sup>(b)</sup>      | 0.01              | 1.36 |        | 2 E-18  |                                                                                   |               |                        |      |          |                                                                                                                            |                             |               |                        |                                    |                                                                                             |    |          |           |        |          |          |
| Monocytes                                                                        | rs10098310 | chr8:129601368      | <i>GSDMC</i> , <i>CCDC26</i> | Nalls MA (21738480), 2011      | A             | NR                     | 0.03              |      | 0.034  | 3 E-20  | 251,559                                                                           | A             | 40.4                   |      | 0.076    | 8.34E-100                                                                                                                  | rs10107630 (chr8:129591389) | C             | 40.3                   | 0.99 (rs10098310)                  | 0.03                                                                                        |    | 0.077    | 8.22E-101 |        | 0.017    | 4.26E-05 |
| Orofacial clefts                                                                 | rs987525   | chr8:128933908      | <i>GSDMC</i> , <i>PVT1</i>   | Birnbaum S (19270707), 2009    | A             | 22.4                   | <0.01             | 2.57 |        | 3 E-24  | 350/320,436                                                                       | A             | 20.7                   | 1.77 | 2.32E-06 | rs6470759 (chr8:129690034)                                                                                                 | G                           | 38.2          | <0.01 (rs987525)       | <0.01                              | 0.68                                                                                        |    | 6.46E-04 | 0.76      |        | 0.038    |          |

**Supplementary Table 2.** Association listed in GWAS catalogue (see URLs) with SNPs in *GSDMC* or *CCDC26*.

NR=Not reported. (a) *N* = cases only for quantitative traits. (b) Effect allele frequency is reported 83% in GWAS catalogue and the original publication states that the ancestral allele frequency is 17%. According to SNP database, G is the ancestral allele, but the original publication seems to assume that the T allele is the ancestral allele. As a result, the GWAS database entry of 83% for the G allele is probably an error, hence we use 17% in the table above.

(c) Comparable results observed for correlated SNP rs55705857 as reported in Jenkins et al., 2012<sup>2</sup>.

\*Existing in-house data obtained for deCODE studies approved by the Icelandic Ethics Committee and Data Protection Authority.

| SNP          | AF (%) | <i>N</i> | Population | Effect (SD) | <i>P</i>              | PMID                  |
|--------------|--------|----------|------------|-------------|-----------------------|-----------------------|
| rs4733724[G] | 19.8   | 252,637  | European   | - 0.05      | $1.4 \times 10^{-41}$ | 25282103 <sup>3</sup> |
| rs6470764[T] | 19.2   | 183,727  | European   | - 0.05      | $1.7 \times 10^{-28}$ | 20881960 <sup>4</sup> |
| rs2062078[T] | 73.0   | 93,926   | East Asian | - 0.04      | $1.3 \times 10^{-13}$ | 25429064 <sup>5</sup> |

**Supplementary Table 3.** Previously reported adult height variants that are highly correlated with rs6651255 [C] ( $r^2 > 0.9$ ) and their association with adult height in large meta-analyses.

| Phenotype                          | Effect<br>(SD) <sup>a</sup> | OR <sup>b</sup> | <i>P</i> | <i>N</i> <sub>case</sub> | <i>N</i> <sub>control</sub> |
|------------------------------------|-----------------------------|-----------------|----------|--------------------------|-----------------------------|
| Osteoarthritis of spine            |                             | 0.96            | 0.35     | 2,009                    | 223,272                     |
| Bone mineral density of spine      | -0.014                      |                 | 0.31     | 20,637                   |                             |
| Osteoporosis w/vertebral fractures |                             | 1.02            | 0.64     | 1,262                    | 178,728                     |

**Supplementary Table 4.** Effect of rs6651255[C] on selected skeletal phenotypes in Icelandic data<sup>6</sup>.

| nr | SNP        | Position (build 38) | Gene   | Williams et al LDD GWAS (N=4,600) |       |       |          | Icelandic LDHsurg (N=4,748) |     |              |       |      |
|----|------------|---------------------|--------|-----------------------------------|-------|-------|----------|-----------------------------|-----|--------------|-------|------|
|    |            |                     |        | Eff all                           | Beta  | SE    | P-value  | Min                         | Maj | Minor AF (%) | OR    | P    |
| 1  | rs2187689  | chr6:32884870       | -      | C                                 | 0.23  | 0.041 | 2.72E-08 | C                           | T   | 7.5          | 1.053 | 0.27 |
| 2  | rs7767277  | chr6:32885265       | -      | A                                 | 0.23  | 0.041 | 2.81E-08 | A                           | C   | 7.5          | 1.053 | 0.27 |
| 3  | rs926849   | chr6:161740587      | PARK2  | C                                 | -0.13 | 0.024 | 3.25E-08 | C                           | T   | 31.5         | 1.014 | 0.59 |
| 4  | rs7744666  | chr6:32891935       | -      | C                                 | 0.2   | 0.037 | 5.58E-08 | C                           | T   | 9.7          | 1.049 | 0.25 |
| 5  | rs11969002 | chr6:32891971       | -      | A                                 | 0.2   | 0.037 | 5.59E-08 | A                           | G   | 9.7          | 1.049 | 0.25 |
| 6  | rs6457690  | chr6:32887940       | -      | A                                 | 0.19  | 0.036 | 9.36E-08 | A                           | G   | 9.7          | 1.048 | 0.25 |
| 7  | rs1029296  | chr6:32888604       | -      | C                                 | 0.19  | 0.036 | 9.39E-08 | C                           | T   | 9.7          | 1.048 | 0.25 |
| 8  | rs6936004  | chr6:32889157       | -      | C                                 | 0.19  | 0.036 | 1.04E-07 | C                           | T   | 9.7          | 1.048 | 0.26 |
| 9  | rs3749982  | chr6:32894830       | -      | A                                 | 0.19  | 0.037 | 1.46E-07 | A                           | T   | 9.7          | 1.048 | 0.26 |
| 10 | rs9469300  | chr6:32892975       | -      | A                                 | 0.19  | 0.037 | 1.47E-07 | A                           | G   | 9.7          | 1.048 | 0.25 |
| 11 | rs10214886 | chr6:32889642       | -      | A                                 | 0.19  | 0.036 | 2.32E-07 | A                           | T   | 9.7          | 1.048 | 0.25 |
| 12 | rs10046257 | chr6:32886920       | -      | A                                 | 0.19  | 0.037 | 3.22E-07 | A                           | G   | 10.1         | 1.047 | 0.26 |
| 13 | rs3019449  | chr6:161744061      | PARK2  | A                                 | -0.12 | 0.023 | 3.68E-07 | A                           | C   | 31.6         | 1.011 | 0.67 |
| 14 | rs1029295  | chr6:32888705       | -      | C                                 | 0.19  | 0.038 | 4.58E-07 | C                           | T   | 9.7          | 1.048 | 0.25 |
| 15 | rs9301951  | chr13:94300578      | GPC6   | C                                 | -0.26 | 0.054 | 9.47E-07 | C                           | T   | 3.8          | 0.969 | 0.63 |
| 16 | rs7896691  | chr10:3112981       | PFKP   | C                                 | 0.17  | 0.035 | 2.02E-06 | C                           | T   | 12.0         | 0.907 | 0.01 |
| 17 | rs6602024  | chr10:3113045       | PFKP   | A                                 | 0.17  | 0.035 | 2.20E-06 | A                           | G   | 12.0         | 0.907 | 0.01 |
| 18 | rs17132175 | chr10:3108622       | PFKP   | C                                 | 0.16  | 0.036 | 3.73E-06 | C                           | G   | 12.0         | 0.907 | 0.01 |
| 19 | rs737631   | chr6:161741401      | PARK2  | A                                 | -0.11 | 0.025 | 4.32E-06 | A                           | G   | 31.4         | 1.01  | 0.70 |
| 20 | rs4802666  | chr19:50217817      | MYH14  | A                                 | -0.13 | 0.029 | 4.55E-06 | A                           | G   | 31.4         | 0.997 | 0.91 |
| 21 | rs1205863  | chr6:11943293       | -      | G                                 | 0.21  | 0.047 | 5.64E-06 | G                           | T   | 11.7         | 1.036 | 0.35 |
| 22 | rs11918654 | chr3:5146561        | ARL8B  | C                                 | -0.11 | 0.024 | 7.10E-06 | C                           | T   | 28.8         | 0.942 | 0.03 |
| 23 | rs4881085  | chr10:3113348       | PFKP   | A                                 | 0.16  | 0.036 | 7.44E-06 | A                           | G   | 12.0         | 0.906 | 0.01 |
| 24 | rs12805875 | chr11:103658904     | -      | A                                 | 0.09  | 0.021 | 8.51E-06 | A                           | G   | 40.2         | 1.023 | 0.37 |
| 25 | rs7103004  | chr11:103655296     | -      | C                                 | 0.09  | 0.021 | 9.20E-06 | C                           | T   | 40.2         | 1.023 | 0.37 |
| 26 | rs4554859  | chr11:103659638     | -      | G                                 | 0.09  | 0.021 | 9.24E-06 | G                           | T   | 40.2         | 1.023 | 0.37 |
| 27 | rs7118412  | chr11:103655026     | -      | A                                 | 0.09  | 0.021 | 9.37E-06 | A                           | G   | 40.2         | 1.022 | 0.38 |
| 28 | rs17034687 | chr3:3638168        | -      | G                                 | -0.23 | 0.038 | 1.82E-09 | G                           | C   | 9.2          | 1.016 | 0.71 |
| 29 | rs4875102  | chr8:4427170        | -      | G                                 | 0.12  | 0.024 | 3.61E-07 | G                           | A   | 28.4         | 0.989 | 0.69 |
| 30 | rs1884158  | chr6:161740634      | PARK2  | T                                 | 0.11  | 0.023 | 3.56E-06 | T                           | C   | 31.0         | 1.014 | 0.59 |
| 31 | rs10998466 | chr10:68866673      | -      | G                                 | 0.53  | 0.114 | 3.59E-06 | G                           | A   | 0.8          | 0.896 | 0.44 |
| 32 | rs1981483  | chr16:580665        | PIGQ   | G                                 | -0.11 | 0.023 | 3.75E-06 | G                           | A   | 46.6         | 0.98  | 0.43 |
| 33 | rs1154053  | chr8:4427868        | -      | G                                 | 0.13  | 0.028 | 3.99E-06 | G                           | C   | 20.1         | 1.005 | 0.86 |
| 34 | rs2484990  | chr10:31226203      | -      | T                                 | -0.68 | 0.148 | 4.39E-06 | T                           | C   | 0.1          | 1.507 | 0.29 |
| 35 | rs1250307  | chr10:31207045      | -      | G                                 | -0.68 | 0.148 | 4.39E-06 | G                           | A   | 0.1          | 1.505 | 0.29 |
| 36 | rs7204439  | chr16:611335        | RAB40C | T                                 | -0.11 | 0.023 | 4.43E-06 | T                           | C   | 45.9         | 0.985 | 0.55 |
| 37 | rs2484992  | chr10:31223169      | -      | T                                 | -0.68 | 0.149 | 4.81E-06 | T                           | C   | 0.1          | 1.507 | 0.29 |
| 38 | rs9488238  | chr6:113695931      | -      | G                                 | 0.28  | 0.061 | 5.17E-06 | G                           | A   | 3.5          | 0.959 | 0.54 |
| 39 | rs763014   | chr16:625680        | RAB40C | T                                 | -0.1  | 0.023 | 5.43E-06 | T                           | C   | 44.2         | 0.977 | 0.35 |
| 40 | rs2657195  | chr8:91547687       | -      | G                                 | 0.13  | 0.028 | 7.54E-06 | G                           | A   | 18.0         | 0.99  | 0.74 |
| 41 | rs11754641 | chr6:64926030       | -      | G                                 | -0.29 | 0.064 | 7.84E-06 | G                           | C   | 4.9          | 1.001 | 0.99 |

Sequence variant at 8q24.21 associates with sciatica caused by lumbar disc herniation

|    |           |                     |      | Williams et al LDD GWAS (N=4,600) |       |       |          | Icelandic LDHsurg (N=4,748) |     |              |       |      |
|----|-----------|---------------------|------|-----------------------------------|-------|-------|----------|-----------------------------|-----|--------------|-------|------|
| nr | SNP       | Position (build 38) | Gene | Eff all                           | Beta  | SE    | P-value  | Min                         | Maj | Minor AF (%) | OR    | P    |
| 42 | rs980238  | chr8:4425096        | -    | C                                 | 0.1   | 0.023 | 9.11E-06 | C                           | A   | 30.7         | 0.981 | 0.47 |
| 43 | rs2017567 | chr16:587212        | -    | T                                 | -0.1  | 0.021 | 9.38E-06 | T                           | C   | 46.6         | 0.98  | 0.42 |
| 44 | rs710924  | chr16:583353        | PIGQ | T                                 | -0.09 | 0.021 | 9.93E-06 | T                           | C   | 46.6         | 0.981 | 0.45 |

**Supplementary Table 5.** Association of markers from Williams *et al.* (2013)<sup>7</sup> with the morphologically defined LDD phenotype, and with the symptomatically determined LDHsurg phenotype in Icelandic data.

| Phenotype                             | OR   | <i>P</i> | <i>N</i> <sub>case</sub> | <i>N</i> <sub>control</sub> |
|---------------------------------------|------|----------|--------------------------|-----------------------------|
| <b><i>Chronic pain conditions</i></b> |      |          |                          |                             |
| Temporomandibular joint disorder      | 0.99 | 0.87     | 1,455                    | 307,435                     |
| Fibromyalgia                          | 0.94 | 0.20     | 2,142                    | 283,446                     |
| Migraine                              | 0.98 | 0.62     | 3,816                    | 289,201                     |
| <b><i>Neuropathic pain</i></b>        |      |          |                          |                             |
| Neuropathic pain (DN4)                | 0.83 | 0.04     | 394                      | 220,531                     |

**Supplementary Table 6.** Effect of rs6651255[C] on chronic and neuropathic pain phenotypes in Icelandic data.



| <i>SNP ID</i> | <i>r<sup>2</sup> with<br/>rs6651255</i> | <b>LDHSurg</b>                 |           | <b>GSDMC</b>                 |               |                                      |               | <b>RP11-274M4.1</b>     |               |
|---------------|-----------------------------------------|--------------------------------|-----------|------------------------------|---------------|--------------------------------------|---------------|-------------------------|---------------|
|               |                                         | <i>Association<br/>results</i> |           | <i>Esophagus-<br/>Mucosa</i> |               | <i>Skin-Sun exp.<br/>(lower leg)</i> |               | <i>Esophagus-Mucosa</i> |               |
|               |                                         | <i>P</i>                       | <i>OR</i> | <i>P</i>                     | <i>Effect</i> | <i>P</i>                             | <i>Effect</i> | <i>P</i>                | <i>Effect</i> |
| rs6651255     | -                                       | 5.6×10 <sup>-12</sup>          | 0.81      | 9.2×10 <sup>-14</sup>        | 0.60          | 4.5×10 <sup>-10</sup>                | 0.31          | 3.7×10 <sup>-6</sup>    | -0.39         |
| rs4345520     | 0.29                                    | 0.06                           | 1.05      | 3.0×10 <sup>-42</sup>        | 0.89          | 3.3×10 <sup>-28</sup>                | 0.45          | 2.7×10 <sup>-15</sup>   | -0.59         |
| rs10092783    | 0.24                                    | 0.11                           | 1.04      | 7.9×10 <sup>-18</sup>        | 0.66          | 3.6×10 <sup>-18</sup>                | 0.36          | 6.7×10 <sup>-16</sup>   | -0.63         |

**Supplementary Table 7.** Significant eQTLs of rs6651255 and the variants that have the most significant eQTLs in the same tissues: rs4345520 and rs10092783 (GTEx, analysis release V6, see URLs).

| <b>Phenotype</b> | <b><i>N</i></b> | <b>Age <i>M (SD)</i></b> |
|------------------|-----------------|--------------------------|
| M51.1 w/o LDHsur | 930             | 47.2 (14.3)              |
| Males            | 512             | 47.1 (15.2)              |
| Females          | 418             | 47.2 (13.2)              |

**Supplementary Table 8.** Demographics of cases with a diagnosed herniated lumbar disc (ICD-10 code M51.1) in Iceland 1997-2015 (N=930), who did not undergo LDHsur.

### Supplementary References

1. Sveinbjornsson, G. *et al.* Weighting sequence variants based on their annotation increases power of whole-genome association studies. *Nat Genet* **48**, 314-7 (2016).
2. Jenkins, R.B. *et al.* A low-frequency variant at 8q24.21 is strongly associated with risk of oligodendroglial tumors and astrocytomas with IDH1 or IDH2 mutation. *Nat Genet* **44**, 1122-5 (2012).
3. Wood, A.R. *et al.* Defining the role of common variation in the genomic and biological architecture of adult human height. *Nat Genet* **46**, 1173-86 (2014).
4. Lango Allen, H. *et al.* Hundreds of variants clustered in genomic loci and biological pathways affect human height. *Nature* **467**, 832-8 (2010).
5. He, M. *et al.* Meta-analysis of genome-wide association studies of adult height in East Asians identifies 17 novel loci. *Hum Mol Genet* **24**, 1791-800 (2015).
6. Styrkarsdottir, U. *et al.* Sequence variants in the PTCH1 gene associate with spine bone mineral density and osteoporotic fractures. *Nat Comm* **7**, 10129 (2016).
7. Williams, F.M. *et al.* Novel genetic variants associated with lumbar disc degeneration in northern Europeans: a meta-analysis of 4600 subjects. *Ann Rheum Dis* **72**, 1141-8 (2013).
